# Quantitative Mapping of Free-Standing Lipid Membranes on Nano-Porous Mica Substrates

*Luca Costa, Adrian Carretero-Genevri, Etienne Ferrain, Pierre-Emmanuel Milhiet,  
Laura Picas.*

*This manuscript has been withdrawn by the author following the requirements of one of the corresponding authors.*

*The author does not wish this work to be cited as reference for the project. If you have any questions, please contact the corresponding author.*
